# Supplementary material
Source: Elsevier journal article supplement (https://www.sciencedirect.com/science/article/pii/S2531043718300461)

**Appendix B**

Appendix B. Yearly count of the cumulative population of eligible COPD patients treated with home NIV during the study period (2011-2014 patients prospectively included in a computerized database), represented in dashed columns; Number of patients who have started ventilation (gray columns) over the years and were included in the analysis.


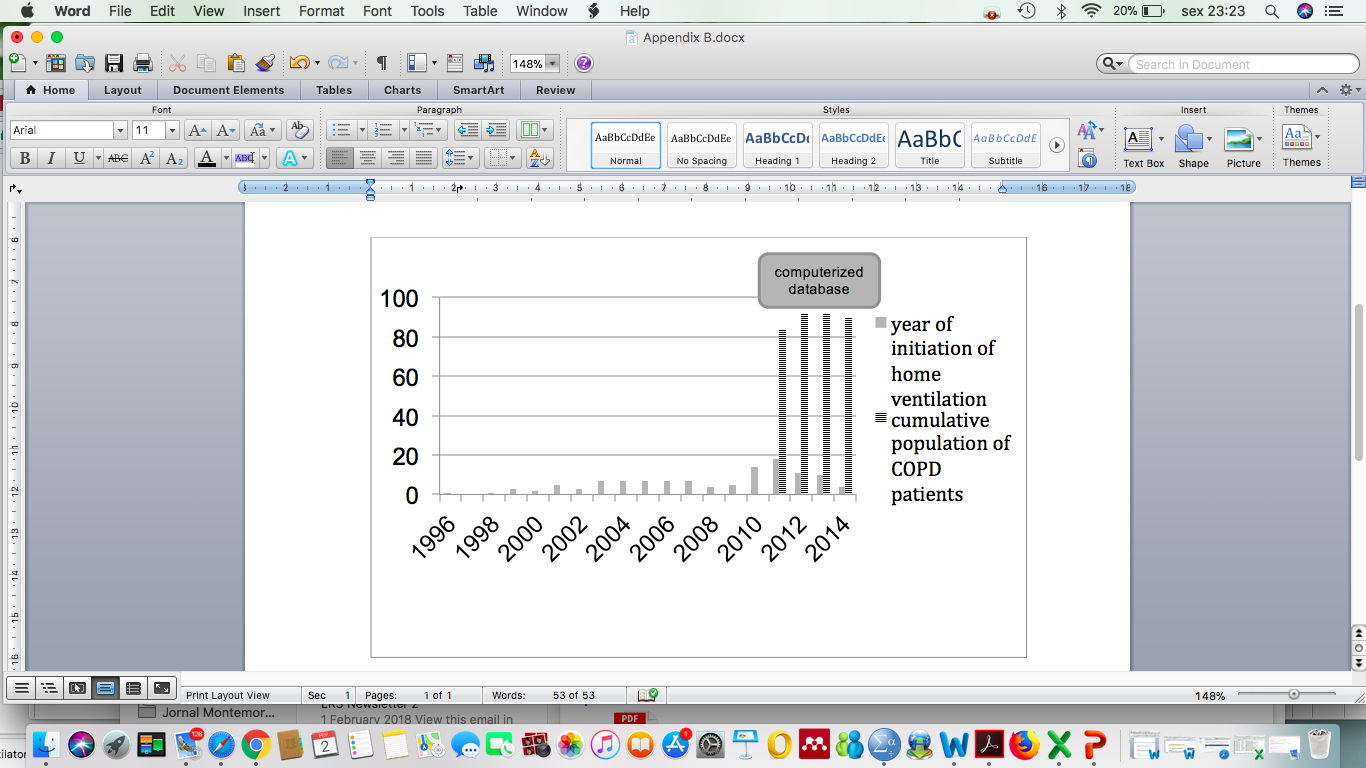

Supplement: mmc2 [file S2531043718300461:mmc2.docx]
